# Supplementary material
Source: Elsevier journal article supplement (https://www.sciencedirect.com/science/article/pii/S1697260016300564)
Supplement: mmc1 [file S1697260016300564:mmc1.docx]

**Appendix** Spanish version of the Sexual Excitation/Sexual Inhibition Inventory for Women (Graham et al., 2006).

| 1. *Si pienso que mi pareja puede herirme emocionalmente, me cohíbo o freno sexualmente.* (If I think a partner might hurt me emotionally, I put the brakes on sexually). 2. *Me excito si mi pareja me dice cosas obscenas o “picantes” durante las relaciones sexuales.* (It turns me on if my partner “talks dirty” to me during sex). 3. *Si alguien pudiera vernos o escucharnos mientras tenemos relaciones sexuales, me resultaría más difícil excitarme.* (If it is possible someone might see or hear us having sex, it is more difficult for me to get aroused). 4. *Cuando alguien me demuestra su inteligencia me excito.* (Someone doing something that shows he/she is intelligent turns me on). 5. *Sentirme dominada en una situación sexual por alguien en quien confío aumenta mi excitación*. (Feeling overpowered in a sexual situation by someone I trust increases my arousal). 6. *Me resulta difícil excitarme si hay otras personas cerca.* (I find it harder to get sexually aroused if other people are nearby). 7. *Si veo que mi pareja se desenvuelve bien socialmente, me excito con más facilidad*. (If I see a partner interacting well with others, I am more easily sexually aroused). 8. *Si estoy preocupada por ser una buena amante, es menos probable que me excite.* (If I am concerned about being a good lover, I am less likely to become aroused). 9. *Ver a mi pareja haciendo algo que muestra su talento, puede hacer que me excite mucho.* (Seeing a partner doing something that shows his/her talent can make me very sexually aroused). 10. *Sería difícil para mí excitarme sexualmente con alguien que tiene una relación con otra persona*. (It would be hard for me to become sexually aroused with someone who is involved with another person). 11. *El contacto visual con alguien que considero sexualmente atractivo me excita mucho*. (Eye contact with someone I find sexually attractive really turns me on). 12. *Me excito mucho si pienso que puedo ser descubierta teniendo relaciones sexuales.* (I get really turned on if I think I may get caught while having sex). (R) 13. *Si creo que estoy siendo utilizada sexualmente pierdo completamente la excitación.* (If I think that I am being used sexually it completely turns me off). 14. *Me resulta más fácil excitarme con alguien con quien pueda tener una relación sentimental.* (It is easier for me to become aroused with someone who has “relationship potential”). 15. *Solo con estar cerca físicamente de mi pareja es suficiente para excitarme.* (Just being physically close with a partner is enough to turn me on). 16. *Si estoy pensando en llegar al orgasmo, me resulta mucho más difícil excitarme*. (If I think about whether I will have an orgasm, it is much harder for me to become aroused). 17. *Me excito mucho cuando alguien me desea sexualmente*. (I get very turned on when someone wants me sexually). 18. *Tener fantasías sexuales puede hacer que me excite rápidamente*. (Fantasizing about sex can quickly get me sexually excited). 19. *Si no estoy segura de lo que siente mi pareja hacia mí, es más difícil que me excite*. (If I am uncertain about how a partner feels about me, it is harder for me to get aroused). 20. *Determinados aromas me resultan muy excitantes.* (Particular scents are very arousing to me). 21. *A menudo tan solo el olor de alguien puede excitarme*. (Often just how someone smells can be a turn on). 22. *Cuando pienso en alguien que considero sexualmente atractivo, me excito fácilmente.* (When I think about someone I find sexually attractive, I easily become sexually aroused). 23. *Con una pareja nueva, me excito fácilmente*. (With a new partner, I am easily aroused). 24. *Si veo a alguien vestido/a de forma sexy, me excito fácilmente*. (If I see someone dressed in a sexy way, I easily become sexually aroused). 25. *Si mi pareja emplea la fuerza física o verbal durante el sexo, mi excitación se reduce*. (If a partner is forceful during sex, it reduces my arousal). (R) 26. *Dominar sexualmente a mi pareja me excita*. (Dominating my partner is arousing to me). 27. *A veces me siento tan tímida o cohibida durante el sexo que no puedo excitarme completamente*. (Sometimes I feel so “shy” or self-conscious during sex that I cannot become fully aroused). 28. *Si estoy preocupada por tardar demasiado tiempo en excitarme, mi excitación puede verse afectada*. (If I am worried about taking too long to become aroused, this can interfere with my arousal). 29. *A veces me siento tan atraída por alguien que no puedo evitar excitarme sexualmente*. (Sometimes I am so attracted to someone, I cannot stop myself from becoming sexually aroused). 30. *Necesito confiar en mi pareja para poder excitarme completamente*. (I really need to trust a partner to become fully aroused). 31. *Me resulta difícil mantener mi excitación sexual*. (It is difficult for me to stay sexually aroused). 32. *Cuando estoy sexualmente excitada, la más mínima cosa puede hacer que pierda la excitación*. (When I am sexually aroused, the slightest thing can turn me off). 33. *A menos que la situación sexual sea “perfecta”, es difícil que me excite*. (Unless things are “just right” it is difficult for me to become sexually aroused). |
| --- |

*Note.* (R) = reverse-scored items. *Arousability*: items 11, 15, 17, 18, 22, 23, 24, and 29; *Sexual Power Dynamics*: items 2, 5, 25, and 26; *Smell*: 20 and 21; *Partner Characteristics*: items 4, 7, and 9; *Setting* (unusual or unconcealed): items 3, 6, and 12; *Relationship Importance*: items 1, 10, 13, 14, 19, and 30; *Arousal Contingency*: items 27, 31, 32, and 33; *Concerns about Sexual Function*: items 8, 16, and 28.
